# Supplementary material for: Small molecule restoration of wildtype structure and function of mutant p53 using a novel zinc-metallochaperone based mechanism
Source: PubMed Central journal article supplement (PMC4253404; doi:10.18632/oncotarget.2432), 2014-09-03
Supplement: oncotarget-05-8879-s002.pdf [file oncotarget-05-8879-s002.pdf]

**Table S1. Equilibrium dialysis reveals minimal binding between DBD and ZMC1.** 20  $\mu\text{M}$  ZMC1 + 10  $\mu\text{M}$   $\text{ZnCl}_2$  was dialyzed against the indicated concentration of protein. Every unit of concentration represents 1/2 of a 726-Zn complex measured by absorbance at 370 nm. Higher concentrations were attempted but failed as the drug would stick to the equilibrium dialysis vessels.

A

r175h (19.3  $\mu\text{M}$ )

| Trial # | [Drug-Zn]<br>Protein Side | [Drug-Zn]<br>Drug Side |
|---------|---------------------------|------------------------|
| 1       | 11.4 $\mu\text{M}$        | 9.1 $\mu\text{M}$      |
| 2       | 11.1 $\mu\text{M}$        | 9.3 $\mu\text{M}$      |
| 3       | 7.7 $\mu\text{M}$         | 8.2 $\mu\text{M}$      |
| 4       | 6.5 $\mu\text{M}$         | 6.1 $\mu\text{M}$      |

B

wt (20  $\mu\text{M}$ )

| Trial # | [Drug-Zn]<br>Protein Side | [Drug-Zn]<br>Drug Side |
|---------|---------------------------|------------------------|
| 1       | 6.8 $\mu\text{M}$         | 5.2 $\mu\text{M}$      |
| 2       | 4.2 $\mu\text{M}$         | 3.4 $\mu\text{M}$      |
| 3       | 6.0 $\mu\text{M}$         | 5.0 $\mu\text{M}$      |
| 4       | 6.0 $\mu\text{M}$         | 4.8 $\mu\text{M}$      |
